# Supplementary material for: Wartezeiten auf einen Psychotherapieplatz vor und nach der Psychotherapiestrukturreform
Source: Springer Nature journal article supplement (doi:10.1007/s00278-021-00551-0), 2021-11-05
Supplement: MOESM3 [file 19832482]

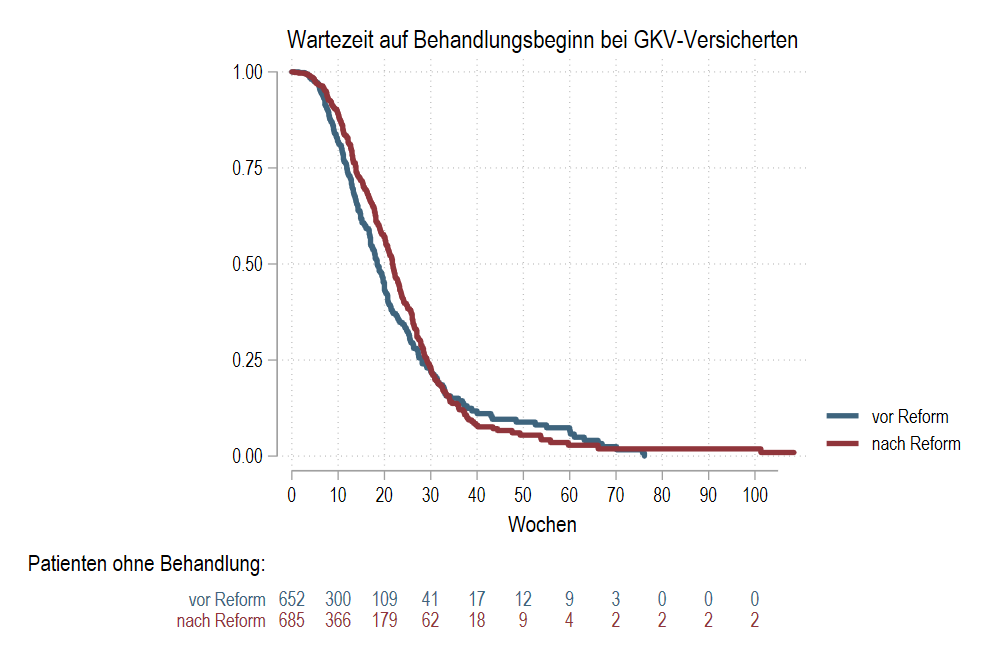


Abbildung Anteil der gesetzlich versicherten Patienten, die nach dem Erstkontakt (Anmeldung in der Praxis) noch keine Behandlung (entweder als Akutbehandlung oder als Richtlinien-Psychotherapie) erhalten haben, im Verlauf der Zeit seit dem Erstkontakt. Patienten, die ins Krankenhaus überwiesen wurden oder bei denen keine Behandlung möglich war, wurden zensiert.
